# Supplementary material for: Synthesis of the Antimicrobial Peptide Murepavadin Using Novel Coupling Agents
Source: MDPI journal article supplement (doi:10.3390/biom14050526), 2024-04-27
Supplement: s1 [file s1]

## Supporting information

**Table S1.** Summary of yields and purities of the different synthetic batches of murepavadin

| Entry | Resin  | Initial resin<br>amount /<br>loading | Coupling<br>agents | Cleavage<br>yield | Cyclization<br>yield | Acidolysis<br>yield | Crude<br>purity | Purification<br>yield | Global<br>yield |
|-------|--------|--------------------------------------|--------------------|-------------------|----------------------|---------------------|-----------------|-----------------------|-----------------|
| A     | 2-CTC  | 253.9 mg                             | 3 eq DIC           | 249.1 mg          | 239.1 mg             | 194.5 mg            | 58 %            | 56.1 mg               | 12 %            |
|       |        | 0.86 mmol/g                          | 3 eq HOBt          | 46 %              | 96 %                 | 90 %                |                 | 29 %                  |                 |
| B     | 2-CTC  | 264.4 mg                             | 3 eq DIC           | 513.0 mg          | 476.0 mg             | 358.4 mg            | 64 %            | 143.4 mg              | 28 %            |
|       |        | 0.86 mmol/g                          | 3 eq K-Oxyma       | 91 %              | 93 %                 | 83 %                |                 | 40 %                  |                 |
| C     | Cl-Trt | 258.4 mg                             | 3 eq DIC           | 118.9 mg          | 104.9 mg             | 78.9 mg             | 67 %            | 35.2 mg               | 14 %            |
|       |        | 0.45 mmol/g                          | 3 eq HOBt          | 41 %              | 89 %                 | 83 %                |                 | 45 %                  |                 |
| D     | 2-CTC  | 245.5 mg                             | 3 eq TBEC          | 344.8 mg          | 325.0 mg             | 260.0 mg            | 60 %            | 93.2 mg               | 27 %            |
|       |        | 0.63 mmol/g                          | 3 eq K-Oxyma       | 90 %              | 95 %                 | 88 %                |                 | 36 %                  |                 |
| E     | 2-CTC  | 256.4 mg                             | 3 eq TBEC          | 391.2 mg          | 372.9 mg             | 301.4 mg            | 67 %            | 117.5 mg              | 30 %            |
|       |        | 0.69 mmol/g                          | 3 eq Oxy-B         | 89 %              | 96 %                 | 89 %                |                 | 39 %                  |                 |
| F     | 2-CTC  | 258.1 mg                             | 3 eq TBEC          | 415.8 mg          | 389.0 mg             | 319.8 mg            | 59 %            | 108.7 mg              | 27 %            |
|       |        | 0.70 mmol/g                          | 3 eq K-Oxy-B       | 93 %              | 94 %                 | 91 %                |                 | 34 %                  |                 |



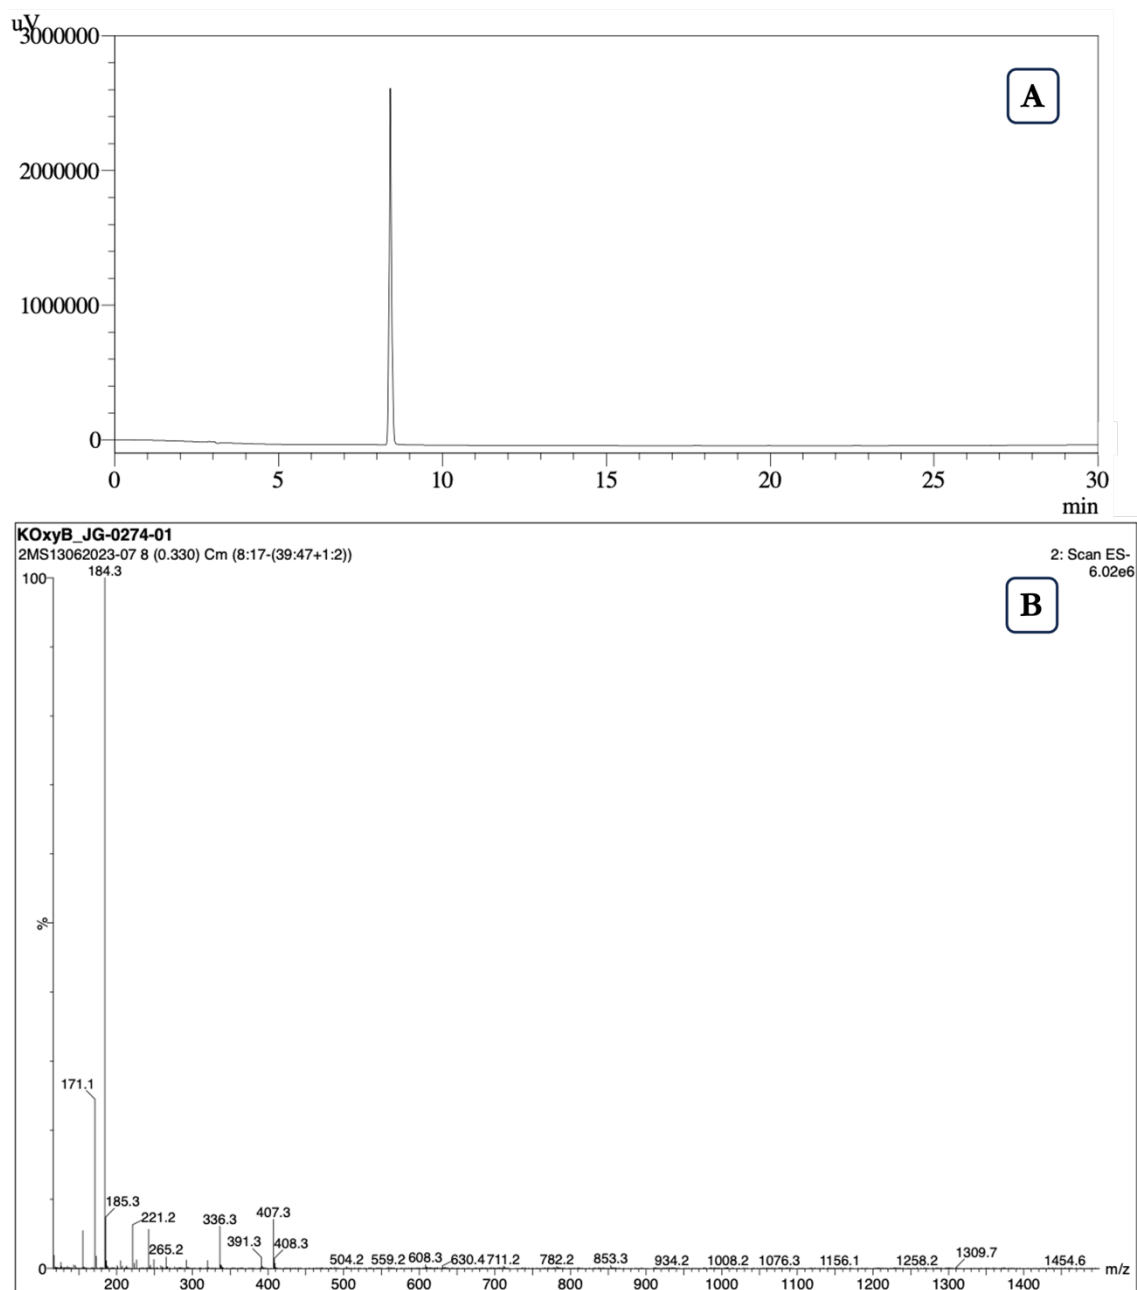



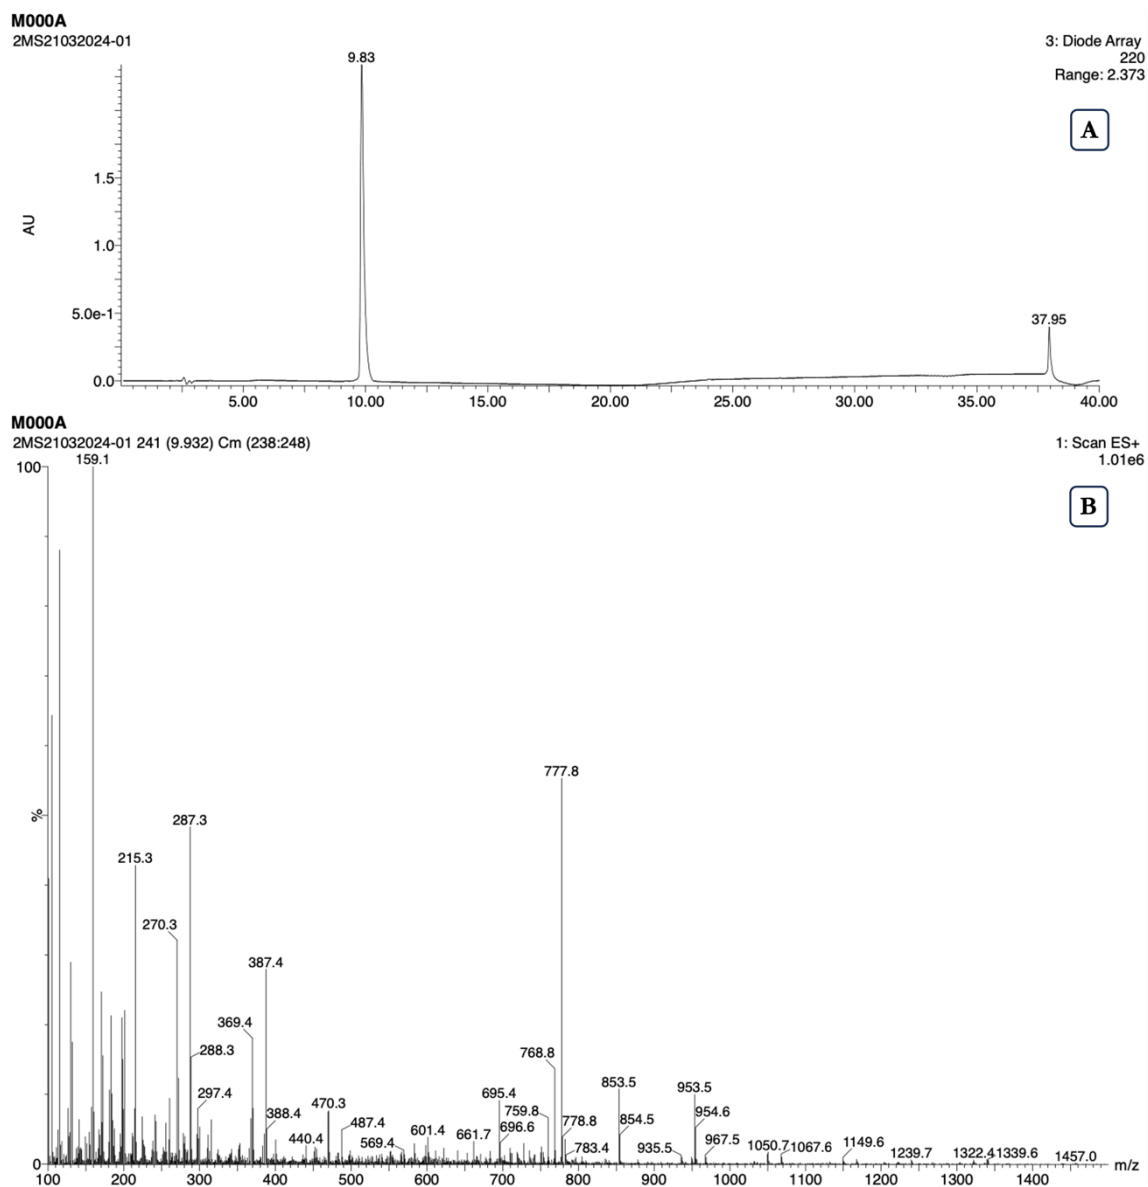

**Figure S2.** HPLC (A) and ESI-MS (B) analysis of murepavadin batch A.



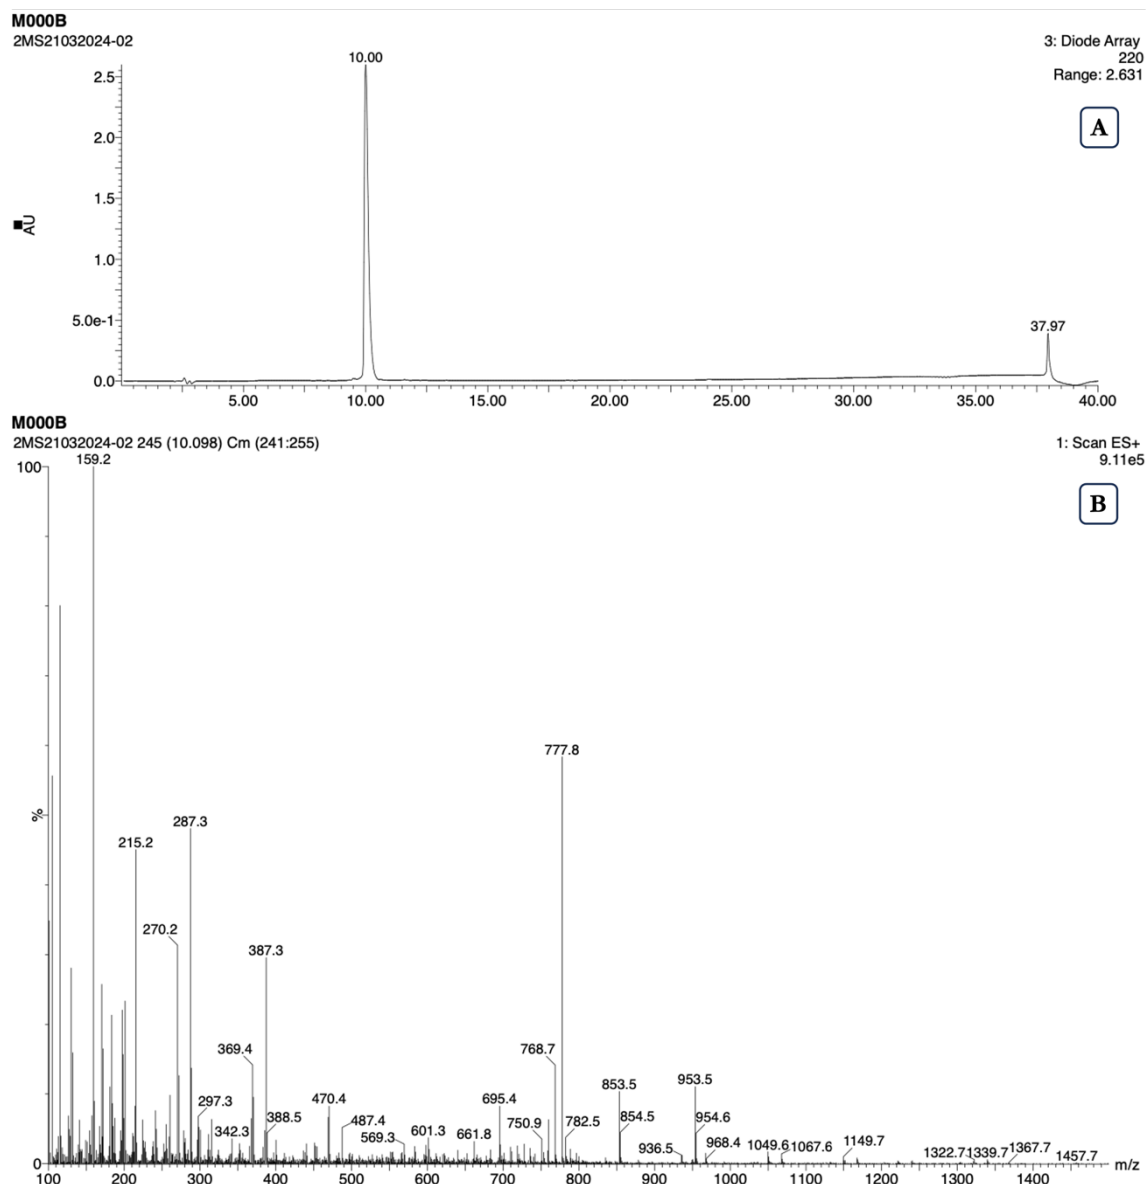

**Figure S3.** HPLC (A) and ESI-MS (B) analysis of murepavadin batch B.



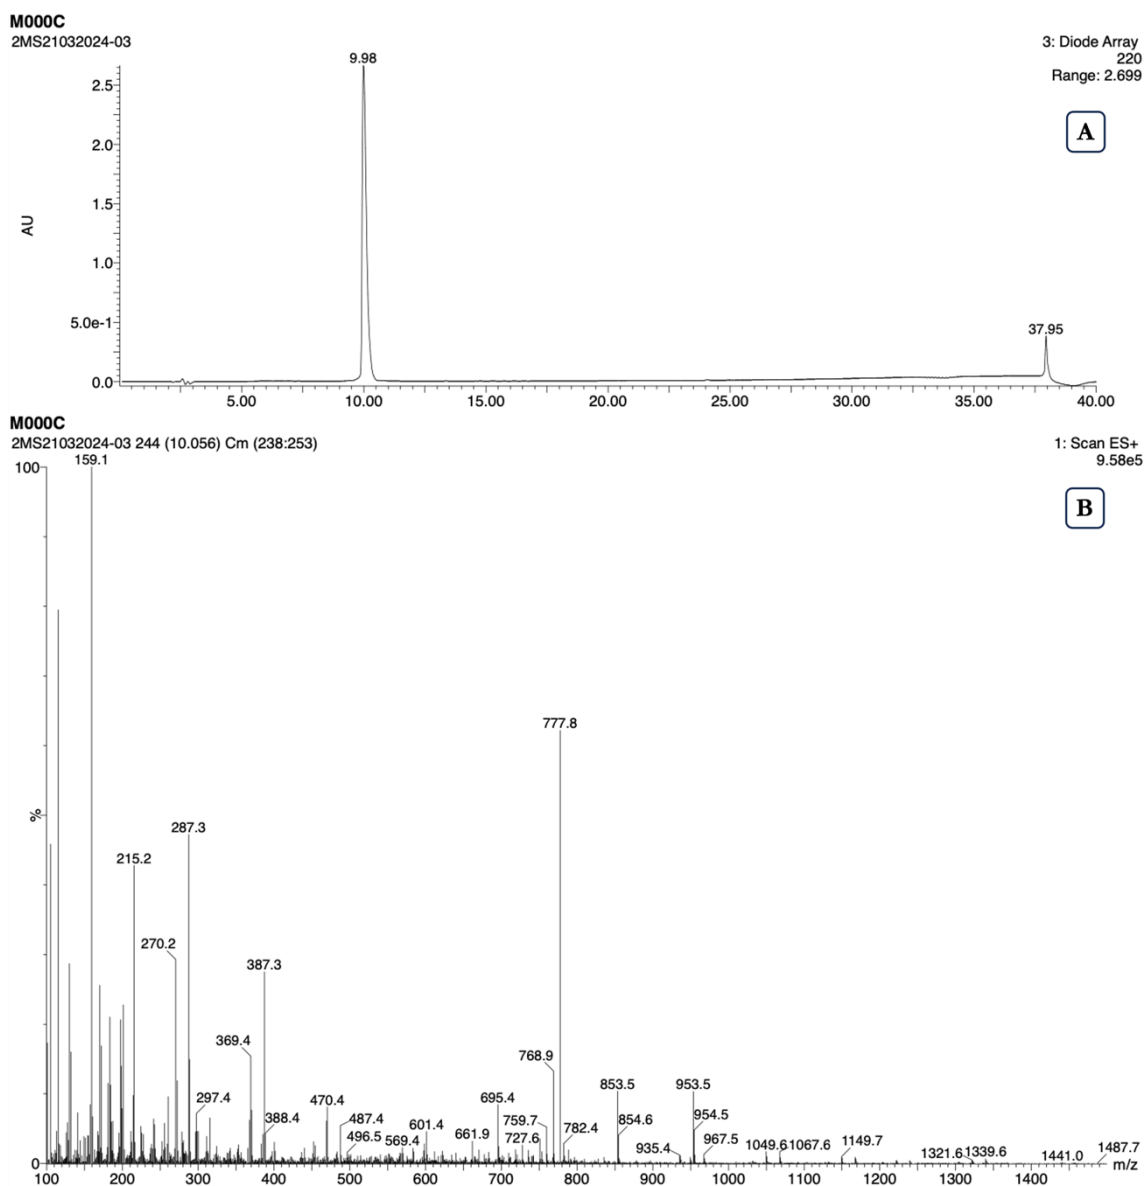

**Figure S4.** HPLC (A) and ESI-MS (B) analysis of murepavadin batch C.



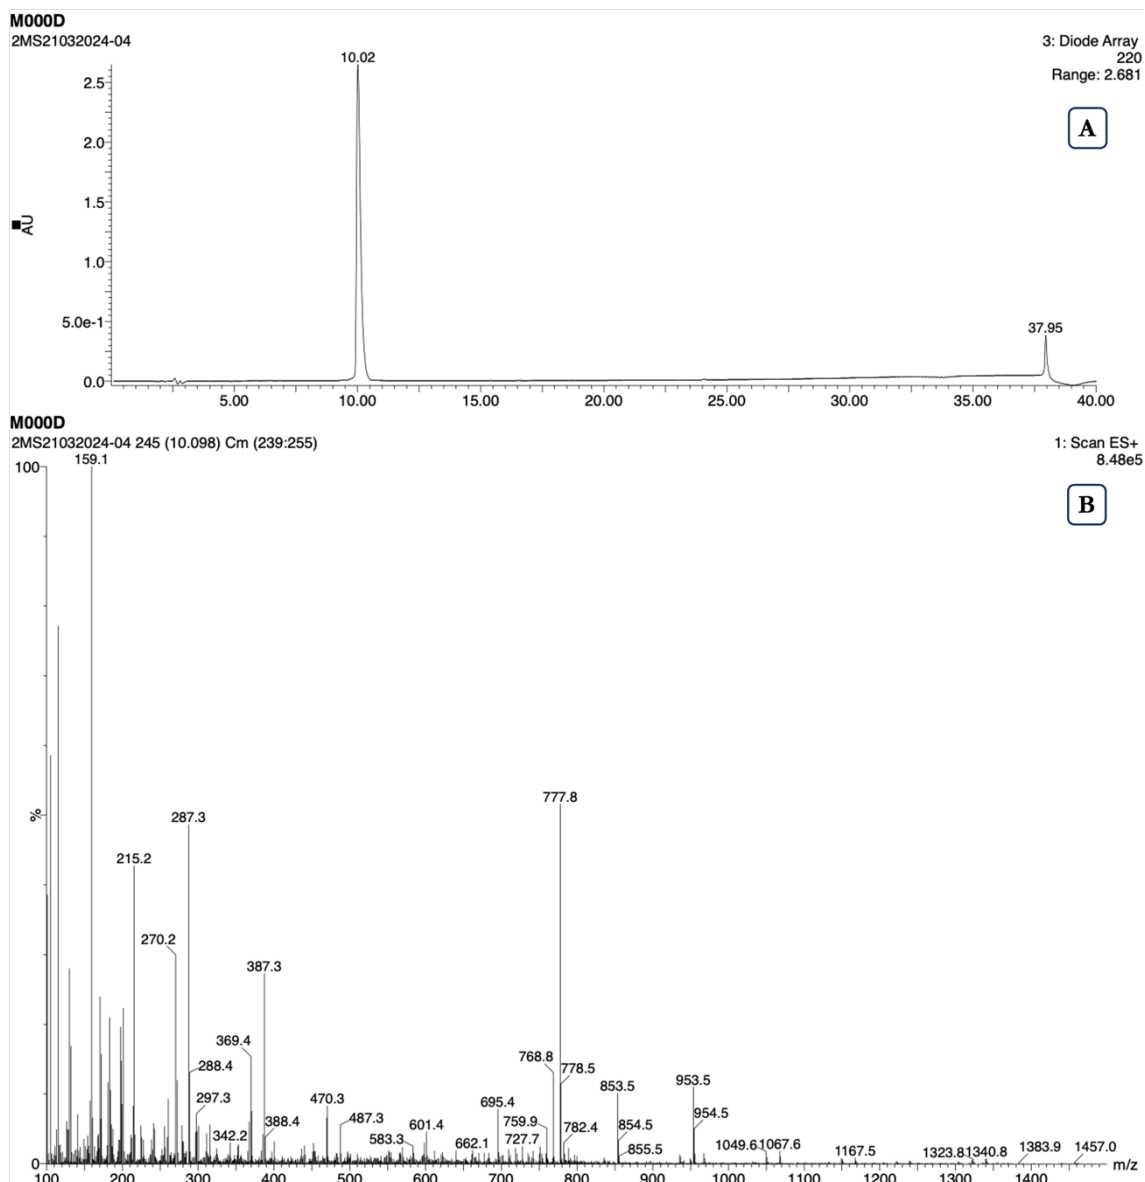

**Figure S5.** HPLC (A) and ESI-MS (B) analysis of murepavadin batch D.



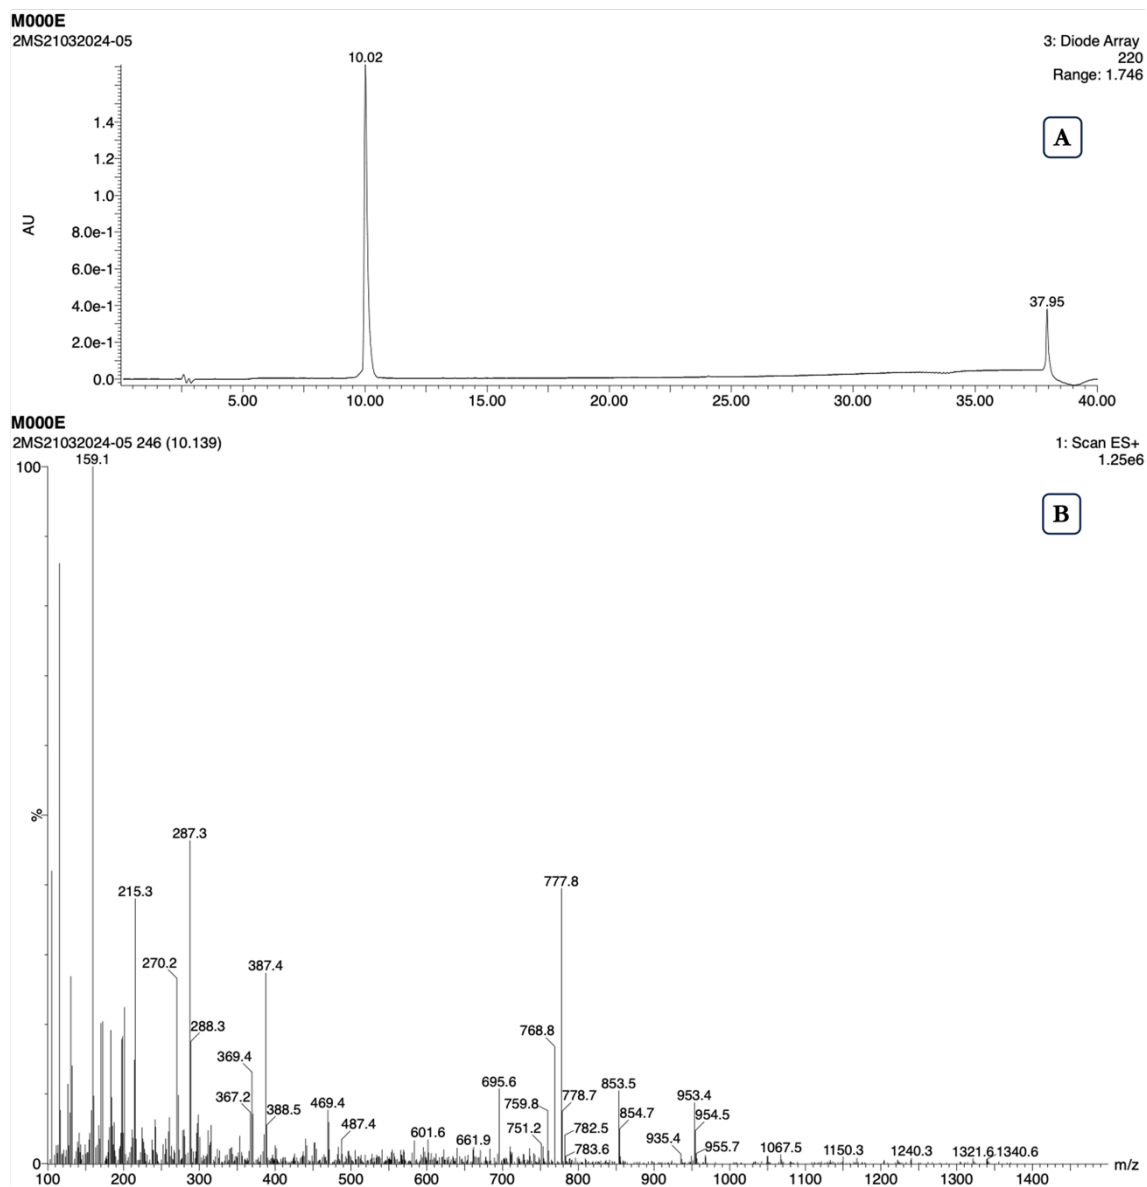

**Figure S6.** HPLC (A) and ESI-MS (B) analysis of murepavadin batch E.



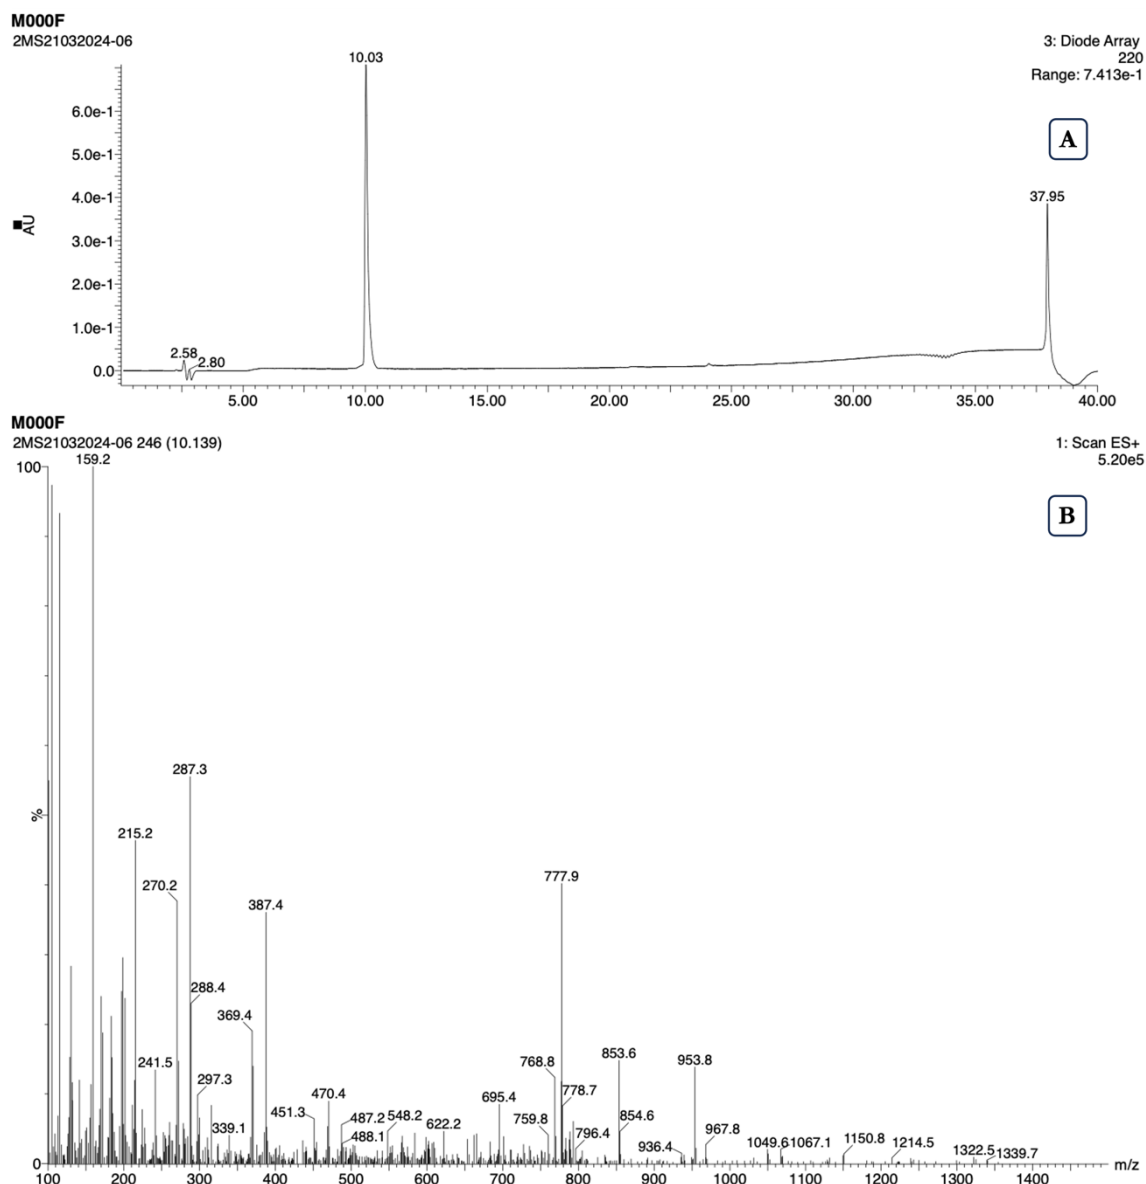

**Figure S7.** HPLC (A) and ESI-MS (B) analysis of murepavadin batch F.
